# Supplementary material
Source: PubMed Central journal article supplement (PMC10518564)
Supplement: NIHMS1931275-supplement-2.pdf [file NIHMS1931275-supplement-2.pdf]

Supplementary Information for

**Base editor scanning charts the DNMT3A activity landscape**

Nicholas Z. Lue, Emma M. Garcia, Kevin C. Ngan, Ceejay Lee, John G. Doench, Brian B. Liao\*

**Supplementary Figure**

|                                                                   |   |
|-------------------------------------------------------------------|---|
| <b>Supplementary Figure 1.</b> Stability reporter gating strategy | 2 |
|-------------------------------------------------------------------|---|

**Supplementary Tables**

|                                                                                          |    |
|------------------------------------------------------------------------------------------|----|
| <b>Supplementary Table 1.</b> Plasmids constructed in this study                         | 3  |
| <b>Supplementary Table 2.</b> Mutagenic primers used for plasmid construction            | 5  |
| <b>Supplementary Table 3.</b> Oligonucleotides used for individual cloning of key sgRNAs | 7  |
| <b>Supplementary Table 4.</b> Primers used for amplicon deep sequencing                  | 8  |
| <b>Supplementary Table 5.</b> Oligonucleotide probe sequences                            | 10 |
| <b>Supplementary Table 6.</b> Coverage statistics for ChIP-seq                           | 11 |
| <b>Supplementary Table 7.</b> Coverage statistics for RRBS                               | 11 |

**Supplementary Data Legends**

|                                                                               |    |
|-------------------------------------------------------------------------------|----|
| <b>Supplementary Data 1.</b> DNMT3A sgRNA library sequences and annotations   | 12 |
| <b>Supplementary Data 2.</b> Full DNMT3A base editor scanning data            | 12 |
| <b>Supplementary Data 3.</b> Summary of DNMT3A base editor scanning results   | 12 |
| <b>Supplementary Data 4.</b> Summary of PWES analysis and clustering results  | 12 |
| <b>Supplementary Data 5.</b> Top editing outcomes for key sgRNAs              | 12 |
| <b>Supplementary Data 6.</b> Frequencies of top alleles in base-edited clones | 12 |
| <b>Supplementary Data 7.</b> Conservation of PWWP domain residues             | 12 |

### Supplementary Fig. 1 | Stability reporter gating strategy.

Representative gating strategy used for stability reporter assay measurements. Quadrant gate in mCherry vs. eGFP plot was set so that wild-type parent K562 cells were mCherry/eGFP double-negative.

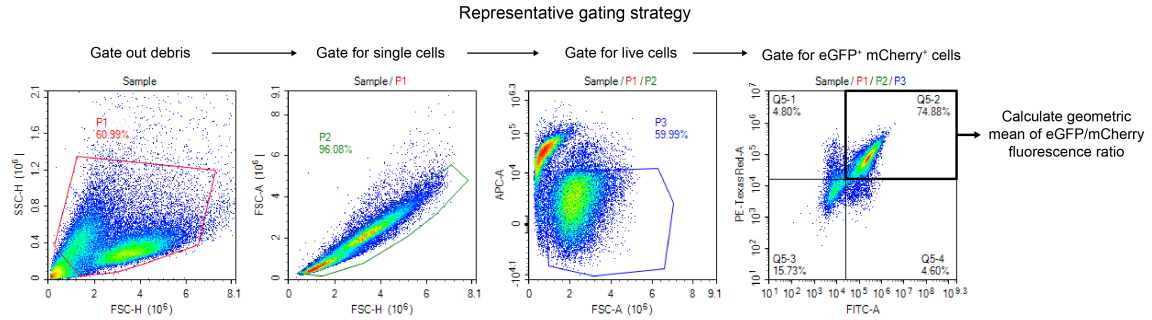

**Supplementary Table 1 | Plasmids constructed in this study.**

DNMT3A2 refers to human DNMT3A isoform 2. Dnmt3a2 refers to mouse Dnmt3a isoform 2.

| Plasmid                                     | Description                                                                                                 |
|---------------------------------------------|-------------------------------------------------------------------------------------------------------------|
| pRRL-5xTetO-pEF-H2B-Citrine-SV40            | Lentiviral, mammalian expression of methylation reporter (Addgene #186966)                                  |
| pRRL-pEF-H2B-mCherry-T2A-rTetR-DNMT3L-SV40  | Lentiviral, mammalian expression of methylation reporter (Addgene #186967)                                  |
| pRRL-pEF-H2B-mCherry-T2A-rTetR-Dest-SV40    | Lentiviral destination vector for cloning protein of interest fused to rTetR for reporter (Addgene #186968) |
| pCilantro2-DNMT3A2                          | Lentiviral, mammalian expression of DNMT3A2 wild-type                                                       |
| pCilantro2-DNMT3A2_G293K/E294K              | Lentiviral, mammalian expression of DNMT3A2 G293K/E294K                                                     |
| pCilantro2-DNMT3A2_R301W                    | Lentiviral, mammalian expression of DNMT3A2 R301W                                                           |
| pCilantro2-DNMT3A2_I310N                    | Lentiviral, mammalian expression of DNMT3A2 I310N                                                           |
| pCilantro2-DNMT3A2_S312F                    | Lentiviral, mammalian expression of DNMT3A2 S312F                                                           |
| pCilantro2-DNMT3A2_R326C                    | Lentiviral, mammalian expression of DNMT3A2 R326C                                                           |
| pCilantro2-DNMT3A2_W330R                    | Lentiviral, mammalian expression of DNMT3A2 W330R                                                           |
| pCilantro2-DNMT3A2_S337L                    | Lentiviral, mammalian expression of DNMT3A2 S337L                                                           |
| pCilantro2-DNMT3A2_E342K                    | Lentiviral, mammalian expression of DNMT3A2 E342K                                                           |
| pCilantro2-DNMT3A2_R366C                    | Lentiviral, mammalian expression of DNMT3A2 R366C                                                           |
| pcDNA3-DNMT3A2                              | Mammalian expression of Flag-DNMT3A2 wild-type                                                              |
| pcDNA3-DNMT3A2_K299N                        | Mammalian expression of Flag-DNMT3A2 K299N                                                                  |
| pcDNA3-DNMT3A2_R301W                        | Mammalian expression of Flag-DNMT3A2 R301W                                                                  |
| pcDNA3-DNMT3A2_W330R                        | Mammalian expression of Flag-DNMT3A2 W330R                                                                  |
| pcDNA3-DNMT3A2_E342K                        | Mammalian expression of Flag-DNMT3A2 E342K                                                                  |
| pcDNA3-DNMT3A2_K343E                        | Mammalian expression of Flag-DNMT3A2 K343E                                                                  |
| pPB-Dnmt3a2-Ires2-mCherry                   | PiggyBac, mammalian expression of Flag-Dnmt3a2 wild-type (Addgene #186969)                                  |
| pPB-Dnmt3a2_R297W-Ires2-mCherry             | PiggyBac, mammalian expression of Flag-Dnmt3a2 R297W                                                        |
| pPB-Dnmt3a2_W326R-Ires2-mCherry             | PiggyBac, mammalian expression of Flag-Dnmt3a2 W326R                                                        |
| pPB-Dnmt3a2_E338K-Ires2-mCherry             | PiggyBac, mammalian expression of Flag-Dnmt3a2 E338K                                                        |
| pPB-Dnmt3a2_E752K-Ires2-mCherry             | PiggyBac, mammalian expression of Flag-Dnmt3a2 E752K                                                        |
| pET28b-His <sub>6</sub> -DNMT3A2_K299N      | Bacterial expression of His <sub>6</sub> -tagged DNMT3A2 K299N                                              |
| pET28b-His <sub>6</sub> -DNMT3A2_R301W      | Bacterial expression of His <sub>6</sub> -tagged DNMT3A2 R301W                                              |
| pET28b-His <sub>6</sub> -DNMT3A2_W330R      | Bacterial expression of His <sub>6</sub> -tagged DNMT3A2 W330R                                              |
| pET28b-His <sub>6</sub> -DNMT3A2_E342K      | Bacterial expression of His <sub>6</sub> -tagged DNMT3A2 E342K                                              |
| pET28b-His <sub>6</sub> -DNMT3A2_K343E      | Bacterial expression of His <sub>6</sub> -tagged DNMT3A2 K343E                                              |
| pET28b-His <sub>6</sub> -DNMT3A2_C520Y      | Bacterial expression of His <sub>6</sub> -tagged DNMT3A2 C520Y                                              |
| pET28b-His <sub>6</sub> -DNMT3A2_G532N      | Bacterial expression of His <sub>6</sub> -tagged DNMT3A2 G532N                                              |
| pET28b-His <sub>6</sub> -DNMT3A2_R556E      | Bacterial expression of His <sub>6</sub> -tagged DNMT3A2 R556E                                              |
| pET28b-His <sub>6</sub> -DNMT3A2_E756K      | Bacterial expression of His <sub>6</sub> -tagged DNMT3A2 E756K                                              |
| pET28b-His <sub>6</sub> -DNMT3A2_E907K      | Bacterial expression of His <sub>6</sub> -tagged DNMT3A2 E907K                                              |
| pET28b-His <sub>6</sub> -MBP-TEV-PWWP       | Bacterial expression of His <sub>6</sub> -MBP-tagged DNMT3A PWWP wild-type (Addgene #186970)                |
| pET28b-His <sub>6</sub> -MBP-TEV-PWWP_R301W | Bacterial expression of His <sub>6</sub> -MBP-tagged DNMT3A PWWP R301W                                      |
| pET28b-His <sub>6</sub> -MBP-TEV-PWWP_R326C | Bacterial expression of His <sub>6</sub> -MBP-tagged DNMT3A PWWP R326C                                      |
| pET28b-His <sub>6</sub> -MBP-TEV-PWWP_W330R | Bacterial expression of His <sub>6</sub> -MBP-tagged DNMT3A PWWP W330R                                      |
| pET28b-His <sub>6</sub> -MBP-TEV-PWWP_S337L | Bacterial expression of His <sub>6</sub> -MBP-tagged DNMT3A PWWP S337L                                      |
| pET28b-His <sub>6</sub> -MBP-TEV-PWWP_E342K | Bacterial expression of His <sub>6</sub> -MBP-tagged DNMT3A PWWP E342K                                      |



**Supplementary Table 2 | Mutagenic primers used for plasmid construction.**

Mutated codons are indicated in red. All primers were obtained from Sigma-Aldrich.

| Mutation        | Gene                | Expression host | Primer Sequences (5' → 3')                                                                   | Forward<br>Reverse |
|-----------------|---------------------|-----------------|----------------------------------------------------------------------------------------------|--------------------|
| G293K/<br>E294K | Human <i>DNMT3A</i> | Mammalian       | CTTTGGCATT <b>AAAAAG</b> CTGGTGTGGGGGAAAC<br>CACACCAG <b>CTTTTT</b> AATGCCAAAGCCCCGG         |                    |
| K299N           | Human <i>DNMT3A</i> | Mammalian       | TGGGGG <b>AAT</b> CTGCGGGGC<br>CCCCGCAG <b>ATT</b> CCCCACA                                   |                    |
| R301W           | Human <i>DNMT3A</i> | Mammalian       | GGGGAAACTGT <b>GG</b> GGCTTCTC<br>GAGAAGCC <b>CCAC</b> AGTTTCCC                              |                    |
| I310N           | Human <i>DNMT3A</i> | Mammalian       | CCAGGCCGC <b>AAT</b> GTGTCTTGG<br>CCAAGACAC <b>ATT</b> GCGGCCTGG                             |                    |
| S312F           | Human <i>DNMT3A</i> | Mammalian       | GCCGCATTGT <b>TTT</b> TGGTGGATGAC<br>GTCATCCACCA <b>AAAC</b> ACAATGCGGC                      |                    |
| R326C           | Human <i>DNMT3A</i> | Mammalian       | TGAAGGCAC <b>CTGCT</b> GGGTCAT<br>ATGACCCA <b>GCAG</b> GTGCCTTCA                             |                    |
| W330R           | Human <i>DNMT3A</i> | Mammalian       | CTGGGTCAT <b>GCGG</b> TTCGGAGA<br>TCTCCGAA <b>CCG</b> CATGACCCAG                             |                    |
| S337L           | Human <i>DNMT3A</i> | Mammalian       | ACGGCAAAT <b>CTT</b> AGTGGTGTGTGT<br>ACACACACC <b>ACTA</b> AGAATTTGCCGT                      |                    |
| E342K           | Human <i>DNMT3A</i> | Mammalian       | GTGGTGTGT <b>GTTAAA</b> AGCTGATGCCG<br>CGGCATCAG <b>CTTTT</b> AACACACACCAC                   |                    |
| K343E           | Human <i>DNMT3A</i> | Mammalian       | GTGTGTTGAG <b>GAG</b> CTGATGCC<br>GGCATCAG <b>CTC</b> CTCAACACAC                             |                    |
| R366C           | Human <i>DNMT3A</i> | Mammalian       | GCAGCCCATGT <b>ATTGT</b> AAAGCCATCTACG<br>CGTAGATGG <b>CTTTACA</b> ATACATGGGCTGC             |                    |
| R297W           | Mouse <i>Dnmt3a</i> | Mammalian       | GGGGGAAACT <b>TTTGGG</b> GCTTCTCC<br>GGAGAAGCC <b>CCA</b> AAGTTTCCCC                         |                    |
| W326R           | Mouse <i>Dnmt3a</i> | Mammalian       | CTGGGTCAT <b>GCGG</b> TTCGGAGA<br>TCTCCGAA <b>CCG</b> CATGACCCAG                             |                    |
| E338K           | Mouse <i>Dnmt3a</i> | Mammalian       | GTGGTGTGT <b>GTA</b> AAAAGCTCATGCCG<br>CGGCATGAG <b>CTTTT</b> CACACACACCAC                   |                    |
| E752K           | Mouse <i>Dnmt3a</i> | Mammalian       | TCTTCTGGCT <b>CTTTAAA</b> AATGTGGTGGCCA<br>TGGCCACCAC <b>ATTTT</b> AAAGAGCCAGAAGA            |                    |
| K299N           | Human <i>DNMT3A</i> | Bacterial       | TTTGGGGC <b>AAC</b> CTCCGCGGTT<br>AACCGCGGAG <b>GTT</b> GCCCCAAA                             |                    |
| R301W           | Human <i>DNMT3A</i> | Bacterial       | GGGCAA <b>ACTCTGG</b> GGTTTCAGTT<br>AACTGAAACC <b>CCAG</b> AGTTTGCCC                         |                    |
| R326C           | Human <i>DNMT3A</i> | Bacterial       | CGGAAGGTAC <b>GTGCT</b> GGGTTATGTG<br>CACATAACCCA <b>GCAC</b> GTACCTTCCG                     |                    |
| W330R           | Human <i>DNMT3A</i> | Bacterial       | CGCTGGGTTAT <b>GCGC</b> TTCGGTGACGG<br>CCGTCACCGAA <b>GCG</b> CATAACCCAGCG                   |                    |
| S337L           | Human <i>DNMT3A</i> | Bacterial       | GACGGTAAG <b>TCTG</b> GTTGTTTGCCTG<br>CACGCAAACA <b>ACCAG</b> GA <b>ACTT</b> ACCGTC          |                    |
| E342K           | Human <i>DNMT3A</i> | Bacterial       | GTTGTTTGCCTG <b>AAAAA</b> ACTCATGCC<br>GGCATGAG <b>TTTTT</b> CACGCAAACAAC                    |                    |
| K343E           | Human <i>DNMT3A</i> | Bacterial       | TTTGCCTGGA <b>GA</b> ACTCATGCCG<br>CGGCATGAG <b>TTCT</b> TCCACGCAAA                          |                    |
| R366C           | Human <i>DNMT3A</i> | Bacterial       | CAGCCGATGT <b>ATTGC</b> AAGGCGATCTAC<br>GTAGATCGC <b>TTGCA</b> ATACATCGGCTG                  |                    |
| C520Y           | Human <i>DNMT3A</i> | Bacterial       | GTGTCAGAATTGCAAGAA <b>CTAT</b> TTTCTGGAATGCC<br>CGCATTCCAGAA <b>ATAG</b> TTCCTTGCATTTCTGACAC |                    |
| G532N           | Human <i>DNMT3A</i> | Bacterial       | AGTATGACGACGAC <b>AACT</b> ACCAGAGTTACT<br>AGTAACTCTGGT <b>AGTT</b> GTCGTCGTCATACT           |                    |

|       |                     |           |                                                                                     |
|-------|---------------------|-----------|-------------------------------------------------------------------------------------|
| R556E | Human <i>DNMT3A</i> | Bacterial | ACAACTGCTGCGAATGCTTTTGCCT<br>ACGCAAAAGCATTTCGCAGCAGTTGT                             |
| E756K | Human <i>DNMT3A</i> | Bacterial | TGGCTGTTCAAAAACGTGGTGG<br>CCACCACGTTTTTGAACAGCCA                                    |
| E907K | Human <i>DNMT3A</i> | Bacterial | No forward primer<br>CAAGCTTGTGACGGAGCTCGAATTCCTACTAAA<br>CGCACGCGAAATATTTTTTCAGCGG |

---

**Supplementary Table 3 | Oligonucleotides used for individual cloning of key sgRNAs.**

All oligonucleotides were obtained from Sigma-Aldrich. sgDNMT3A was previously reported in Liao et al., *Nat. Genet.* 47, 469–478, 2015.

| sgRNA                   | Protospacer          | Sequences (5' → 3')                                     | Forward<br>Reverse |
|-------------------------|----------------------|---------------------------------------------------------|--------------------|
| sgLucA<br>(Control)     | GGATCTACTGGGTTACCTAA | CACCGGGATCTACTGGGTTACCTAA<br>AAACTTAGGTAACCCAGTAGATCCC  |                    |
| sgDNMT3A<br>(CRISPR KO) | GCATGATGCGCGGCCCAAGG | CACCGGCATGATGCGCGGCCCAAGG<br>AAACCCCTGGGCGCGCATCATGCC   |                    |
| sgDNMT3B<br>(CRISPR KO) | CCCAACAACACGCAACCAGG | CACCGCCCAACAACACGCAACCAGG<br>AAACCCCTGGTTGCGTGTGTTGGGC  |                    |
| sgW698                  | GCCCCACTCCTGGATCTGGG | CACCGGCCCACTCCTGGATCTGGG<br>AAACCCAGATCCAGGAGTGGGGCC    |                    |
| sgE756                  | ATTCTCAAAGAGCCAGAAGA | CACCGATTCTCAAAGAGCCAGAAGA<br>AAACTCTTCTGGCTCTTTGAGAATC  |                    |
| sgG532                  | GGTAGCCGTCGTCGTCGTAC | CACCGGGTAGCCGTCGTCGTCGTAC<br>AAACGTACGACGACGACGGCTACCC  |                    |
| sgG293/E294             | GCTCCCCAATGCCAAAGCCC | CACCGGCTCCCCAATGCCAAAGCCC<br>AAACGGGCTTTGGCATTGGGGAGCC  |                    |
| sgR301                  | AACTGCGGGGCTTCTCCTGG | CACCGAACTGCGGGGCTTCTCCTGG<br>AAACCCAGGAGAAGCCCCGCAGTTC  |                    |
| sgS312.1                | CATTGTGTCTTGGTGGATGA | CACCGCATTGTGTCTTGGTGGATGA<br>AAACTCATCCACCAAGACACAATGC  |                    |
| sgS312.2                | TGTCTTGGTGGATGACGGGC | CACCGTGTCTTGGTGGATGACGGGC<br>AAACGCCCCGTCATCCACCAAGACAC |                    |
| sgS337.1                | AAATTCTCAGTGGTAAGTTG | CACCGAAATTCTCAGTGGTAAGTTG<br>AAACCAACTTACCACTGAGAATTTT  |                    |
| sgS337.2                | ATTCTCAGTGGTAAGTTGTG | CACCGATTCTCAGTGGTAAGTTGTG<br>AAACCACAACTTACCACTGAGAATC  |                    |
| sgE342.1                | CTTCTCAACACACACCTGGG | CACCGCTTCTCAACACACACCTGGG<br>AAACCCAGGTGTGTGTTGAGAAGC   |                    |
| sgE342.2                | TCAGCTTCTCAACACACACC | CACCGTCAGCTTCTCAACACACACC<br>AAACGGTGTGTGTTGAGAAGCTGAC  |                    |
| sgE342.3<br>(Not a hit) | GCTTCTCAACACACACCTGG | CACCGGCTTCTCAACACACACCTGG<br>AAACCCAGGTGTGTGTTGAGAAGCC  |                    |
| sgR366                  | GTACCGCAAAGCCATCTACG | CACCGGTACCGCAAAGCCATCTACG<br>AAACCGTAGATGGCTTTGCGGTACC  |                    |
| sgC520                  | AAGCAGTTCTAGACAGCAGC | CACCGAAGCAGTTCTAGACAGCAGC<br>AAACGCTGCTGTCTAGAACTGCTTC  |                    |
| sgD641                  | CATCAAAGAGAGACAGCACC | CACCGCATCAAAGAGAGACAGCACC<br>AAACGGTGTGTCTCTCTTTGATGC   |                    |
| sgE664/V665             | ACACCTCCGAGGCAATGTAG | CACCGACACCTCCGAGGCAATGTAG<br>AAACCTACATTGCCTCGGAGGTGTC  |                    |
| sgD668                  | GGAGTCTCACACACCTCCG  | CACCGGAGTCTCACACACCTCCG<br>AAACCGGAGGTGTGTGAGGACTCCC    |                    |
| sgL737                  | ACCGCCTCCTGCATGATGCG | CACCGACCGCCTCCTGCATGATGCG<br>AAACCGCATCATGCAGGAGGCGGTC  |                    |
| sgP799                  | CCTTCCCGGTATGAACAGGT | CACCGCCTTCCCGGTATGAACAGGT<br>AAACACCTGTTCATACCGGGAAGGC  |                    |
| sgT808                  | ATCCACTGTGAATGATAAGC | CACCGATCCACTGTGAATGATAAGC<br>AAACGCTTATCATTACAGTGGATC   |                    |
| sgE907                  | ACTCCTTCAGCGGAGCGAAG | CACCGACTCCTTCAGCGGAGCGAAG<br>AAACCTTCGCTCCGCTGAAGGAGTC  |                    |

### Supplementary Table 4 | Primers used for amplicon deep sequencing.

All primers were obtained from Sigma-Aldrich. Bisulfite sequencing primers were designed using MethPrimer (Li & Dahiya, *Bioinformatics* 18, 1427–1431, 2002).

| Name      | Target                                                   | Sequence                                                         |
|-----------|----------------------------------------------------------|------------------------------------------------------------------|
| 3A-F1     | <i>DNMT3A</i> exon 7, 5' end                             | ACACTCTTCCCTACACGACGCTCTTCCGATCTNNNNAC<br>CACTGTGTAATGATTTCTGCTC |
| 3A-R1     | <i>DNMT3A</i> exon 7, 5' end                             | TGGAGTTCAGACGTGTGCTCTTCCGATCTGGCCCTGGG<br>ATCAAGAACCTT           |
| 3A-F2     | <i>DNMT3A</i> exon 7, 3' end                             | TGGAGTTCAGACGTGTGCTCTTCCGATCTACCACTGTGT<br>AATGATTTCTGCTC        |
| 3A-R2     | <i>DNMT3A</i> exon 7, 3' end                             | ACACTCTTCCCTACACGACGCTCTTCCGATCTNNNNGG<br>CCCTGGGATCAAGAACCTT    |
| 3A-F3     | <i>DNMT3A</i> exon 8                                     | ACACTCTTCCCTACACGACGCTCTTCCGATCTNNNNGT<br>AAGCCTCGGCAACAAGG      |
| 3A-R3     | <i>DNMT3A</i> exon 8                                     | TGGAGTTCAGACGTGTGCTCTTCCGATCTAGTGCTCTAG<br>GCTCCTCCTC            |
| 3A-F4     | <i>DNMT3A</i> exon 14                                    | ACACTCTTCCCTACACGACGCTCTTCCGATCTNNNNTC<br>CTGGTGGTTTCTGACCCT     |
| 3A-R4     | <i>DNMT3A</i> exon 14                                    | TGGAGTTCAGACGTGTGCTCTTCCGATCTCCAAGGTGTG<br>CTACCTGGAA            |
| 3A-F5     | <i>DNMT3A</i> exon 15                                    | TGGAGTTCAGACGTGTGCTCTTCCGATCTGTGGGAGCTT<br>GGGACACC              |
| 3A-R5     | <i>DNMT3A</i> exon 15                                    | ACACTCTTCCCTACACGACGCTCTTCCGATCTNNNNCA<br>GCACCTCTTGGGCCTG       |
| 3A-F6     | <i>DNMT3A</i> exon 16                                    | ACACTCTTCCCTACACGACGCTCTTCCGATCTNNNNAG<br>TAACGGTGCTGTCTGCTG     |
| 3A-R6     | <i>DNMT3A</i> exon 16                                    | TGGAGTTCAGACGTGTGCTCTTCCGATCTCCTCCAGGTG<br>CTGAGTGTG             |
| 3A-F7     | <i>DNMT3A</i> exon 17                                    | ACACTCTTCCCTACACGACGCTCTTCCGATCTNNNNTT<br>CTTCCTGTCTGCCTCTGT     |
| 3A-R7     | <i>DNMT3A</i> exon 17                                    | TGGAGTTCAGACGTGTGCTCTTCCGATCTAGGGTCATCG<br>GGAATAGCTG            |
| 3A-F8     | <i>DNMT3A</i> exon 18                                    | TGGAGTTCAGACGTGTGCTCTTCCGATCTGATGGCTTTC<br>TCTTCCGACCTC          |
| 3A-R8     | <i>DNMT3A</i> exon 18                                    | ACACTCTTCCCTACACGACGCTCTTCCGATCTNNNNCC<br>AAACCAAGGTTGCTGGCTAT   |
| 3A-F9     | <i>DNMT3A</i> exon 19                                    | TGGAGTTCAGACGTGTGCTCTTCCGATCTAGTGTGTGGC<br>TCCTGAGAGA            |
| 3A-R9     | <i>DNMT3A</i> exon 19                                    | ACACTCTTCCCTACACGACGCTCTTCCGATCTNNNNCT<br>ATGGGTCATCCCACCTGC     |
| 3A-F10    | <i>DNMT3A</i> exon 20                                    | ACACTCTTCCCTACACGACGCTCTTCCGATCTNNNNCC<br>GCTGTTATCCAGTTTCTGTT   |
| 3A-R10    | <i>DNMT3A</i> exon 20                                    | TGGAGTTCAGACGTGTGCTCTTCCGATCTGAGAAGCAG<br>GCGGGACAAG             |
| 3A-F11    | <i>DNMT3A</i> exon 22                                    | TGGAGTTCAGACGTGTGCTCTTCCGATCTCAGCACTCAC<br>CCTGCC                |
| 3A-R11    | <i>DNMT3A</i> exon 22                                    | ACACTCTTCCCTACACGACGCTCTTCCGATCTNNNNTC<br>GCTACCTCAGTTTGCCC      |
| Rep-BS-F1 | Methylation reporter, 5' end, after bisulfite conversion | TGGAGTTCAGACGTGTGCTCTTCCGATCTGTTTATTTTTT<br>ATTAGTGATAGAGAA      |



|           |                                                                |                                                                    |
|-----------|----------------------------------------------------------------|--------------------------------------------------------------------|
| Rep-BS-R1 | Methylation reporter,<br>5' end, after<br>bisulfite conversion | ACACTCTTTCCCTACACGACGCTCTTCCGATCTNNNNAA<br>ACCAAACCTCAACTCAAACAC   |
| Rep-BS-F2 | Methylation reporter,<br>3' end, after<br>bisulfite conversion | TGGAGTTCAGACGTGTGCTCTTCCGATCTCCTCAAACAA<br>TAATTCAAAATTTTT         |
| Rep-BS-R2 | Methylation reporter,<br>3' end, after<br>bisulfite conversion | ACACTCTTTCCCTACACGACGCTCTTCCGATCTNNNNTT<br>TGGTATGGTGGTAAGTTTGATAT |

---

Primer binding sequence

Overhang for amplification with P5 site primer

Overhang for amplification with P7 site primer

**Supplementary Table 5 | Oligonucleotide probe sequences.**

| Name    | Description           | Sequence (5' → 3')                       | Source                         |
|---------|-----------------------|------------------------------------------|--------------------------------|
| Probe-F | EMSA/FP probe, top    | /5Cy3/CTGAATACTACTTGGCTCCTC<br>TAACCTGAT | Integrated DNA<br>Technologies |
| Probe-R | EMSA/FP probe, bottom | ATCAGGTTAGAGGAGCCAAGTAGTA<br>TTCAG       | Integrated DNA<br>Technologies |

**Supplementary Table 6 | Coverage statistics for ChIP-seq.**

| Sample                | Raw reads  | Aligned reads after deduplication |
|-----------------------|------------|-----------------------------------|
| TKO ESC ChIP Input    | 30,946,078 | 22,369,501                        |
| TKO ESC H3K4me3 ChIP  | 21,919,238 | 16,852,907                        |
| TKO ESC H3K36me2 ChIP | 89,059,296 | 52,330,555                        |

**Supplementary Table 7 | Coverage statistics for RRBS.**

| Sample      | Raw reads  | Aligned reads | CpGs with 5× coverage | % Bisulfite conversion |
|-------------|------------|---------------|-----------------------|------------------------|
| WT rep 1    | 19,313,422 | 10,675,643    | 1,361,494             | 99.75                  |
| WT rep 2    | 20,746,007 | 11,638,622    | 1,182,394             | 99.76                  |
| R297W rep 1 | 25,744,902 | 14,445,407    | 1,267,765             | 99.76                  |
| R297W rep 2 | 19,648,555 | 11,051,245    | 1,187,723             | 99.76                  |
| W326R rep 1 | 24,182,744 | 13,169,409    | 1,385,240             | 99.77                  |
| W326R rep 2 | 18,131,613 | 9,847,876     | 1,246,368             | 99.78                  |
| E338K rep 1 | 24,404,294 | 14,249,868    | 1,442,271             | 99.77                  |
| E338K rep 2 | 16,019,954 | 8,737,686     | 1,259,164             | 99.78                  |
| E752K rep 1 | 21,181,866 | 11,858,068    | 1,413,761             | 99.79                  |
| E752K rep 2 | 21,597,024 | 11,915,160    | 1,300,865             | 99.77                  |

## Supplementary Data Legends

Supplementary Data 1–7 are supplied as a separate Excel file.

### Supplementary Data 1 | DNMT3A sgRNA library sequences and annotations.

sgRNA\_pos and Edit\_window annotations refer to genomic coordinates. sgRNA classifications are in the Mut\_type column (No\_C is equivalent to no predicted edits, Non-exon is equivalent to intron/UTR). Mut\_list\_3A1 and Edit\_site\_3A1 contain the expected base editing mutation(s), if any, and the target site assigned to each sgRNA, respectively, using the canonical isoform 1 numbering (out of 912 residues). Mut\_list\_3A2 and Edit\_site\_3A2 contain the same, except using isoform 2 numbering (out of 723 residues). Note that the library was designed against isoform 2, and residues 1–24 are not shared with isoform 1.

### Supplementary Data 2 | Full DNMT3A base editor scanning data.

DNMT3A base editor scanning read counts after ( $\text{Log}_2 + 1$ )-transformation and normalization to plasmid library counts. Annotations as in Supplementary Table 1. Mutation\_list displays the expected mutations using isoform 1 numbering.

### Supplementary Data 3 | Summary of DNMT3A base editor scanning results.

Summary of processed DNMT3A base editor scanning data for citrine<sup>+</sup> cells at day 9, showing sgRNA scores and whether each sgRNA is enriched, depleted, or unchanged. sgRNAs tested individually in this paper are indicated along with the result of validation. Other columns are defined as in Supplementary Tables 1 and 2.

### Supplementary Data 4 | Summary of PWES analysis and clustering results.

sgRNA scores (sgRNA\_score\_day9\_citrine\_pos), cluster assignments (Cluster), and summed  $\Delta$ PWES scores (Summed\_delta\_PWES) for missense sgRNAs considered in the PWES analysis (n = 118).

### Supplementary Data 5 | Top editing outcomes for key sgRNAs.

Editing outcomes with at least 1% allele frequency are shown for each sgRNA. Genotyping results shown here correspond to bulk base-edited cells (not sorted based on citrine expression) prior to treatment with dox. The Allele column shows the nucleotide sequence within a 40 bp window centered around the sgRNA protospacer (i.e., extending 10 bp past the protospacer in each direction), in the direction of the *DNMT3A* gene. Exonic sequences are shown in uppercase, and intronic sequences are shown in lowercase. The Product column shows the translated protein product within that region.

### Supplementary Data 6 | Frequencies of top alleles in base-edited clones.

Alleles with at least 5% frequency are shown for each clone. The Allele column shows the nucleotide sequence within a 40 bp window centered around the sgRNA protospacer (i.e., extending 10 bp past the protospacer in each direction), in the direction of the *DNMT3A* gene (sgR301) or antisense to it (others). Annotation corresponds to legend in Extended Data Fig. 3a.

### Supplementary Data 7 | Conservation of PWWP domain residues.

Conservation by residue within a diverse set of proteins containing PWWP domains (Conservation\_all\_PWWP) or within only proteins sharing the DNMT3A domain structure (Conservation\_only\_DNMT3A\_like). See Methods for details.
